# Supplementary material
Source: Research Square preprint supplement (doi:10.21203/rs.3.rs-8929107/v1)
Supplement: Supplementary file 1 [file 594d58b1cfed8914a231f878.docx]

Supplementary Materials

**Table 1S** Post-operative Echocardiographic data.

| Post-operative echocardiographic variables |  |
| --- | --- |
| Left ventricular ejection fraction, % | 58(53;62) |
| Moderate Mitral Valve Regurgitation | 3(0.76%) |
| Severe Mitral Valve Regurgitation | 2(0.51%) |
| End-diastolic volume, mL | 92.76±38.55 |
| End-systolic volume, mL | 36(27;50) |
| End-diastolic diameter, mm | 46(29;52) |
| Mean Gradient Mitral Valve (mmHg) | 3.57±1.41 |
| End-systolic diameter, mm | 29(23;34) |
| Systolic PA pressure, mmHg | 28(25;33) |
| TAPSE, mm | 15(12;17) |

Values are mean ± standard deviation, median and interquartile range (in brackets), or counts and percentages (in parentheses).

PA=pulmonary artery; TAPSE=tricuspid annular plane systolic excursion
